# Supplementary material for: New insight into lignin aggregation guiding efficient synthesis and functionalization of a lignin nanosphere with excellent performance
Source: Royal Society of Chemistry journal article supplement (doi:10.1039/d1gc03651c), 2021-12-09
Supplement: d1gc03651c1.pdf [file d1gc03651c1.pdf]

## Supporting Information

# New insight into lignin aggregation guiding efficient synthesis and functionalization of lignin nanosphere with excellent performance

Liheng Chen<sup>a,b,†\*</sup>, Si-Man Luo<sup>a,†</sup>, Cong-Min Huo<sup>a</sup>, Yun-Feng Shi<sup>a</sup>, Jun Feng<sup>c</sup>, Jing-Yi Zhu<sup>a,\*</sup>, and Wei Xue<sup>a,\*</sup>, Xueqing Qiu<sup>b</sup>

<sup>a</sup> Key Laboratory of Biomaterials of Guangdong Higher Education Institutes,  
Guangdong Provincial Engineering and Technological Research Center for Drug  
Carrier Development, Department of Biomedical Engineering, Jinan University,  
Guangzhou 510632, China

<sup>b</sup> School of Chemical Engineering and Light Industry, Guangdong University of  
Technology, Guangzhou 510006, China

<sup>c</sup> Key Laboratory of Biomedical Polymers of Ministry of Education & Department of  
Chemistry, Wuhan University, Wuhan 430072, China

\* Corresponding Author E-mail: lihengchen@gdut.edu.cn, jyzhu@jnu.edu.cn,  
weixue\_jnu@aliyun.com,

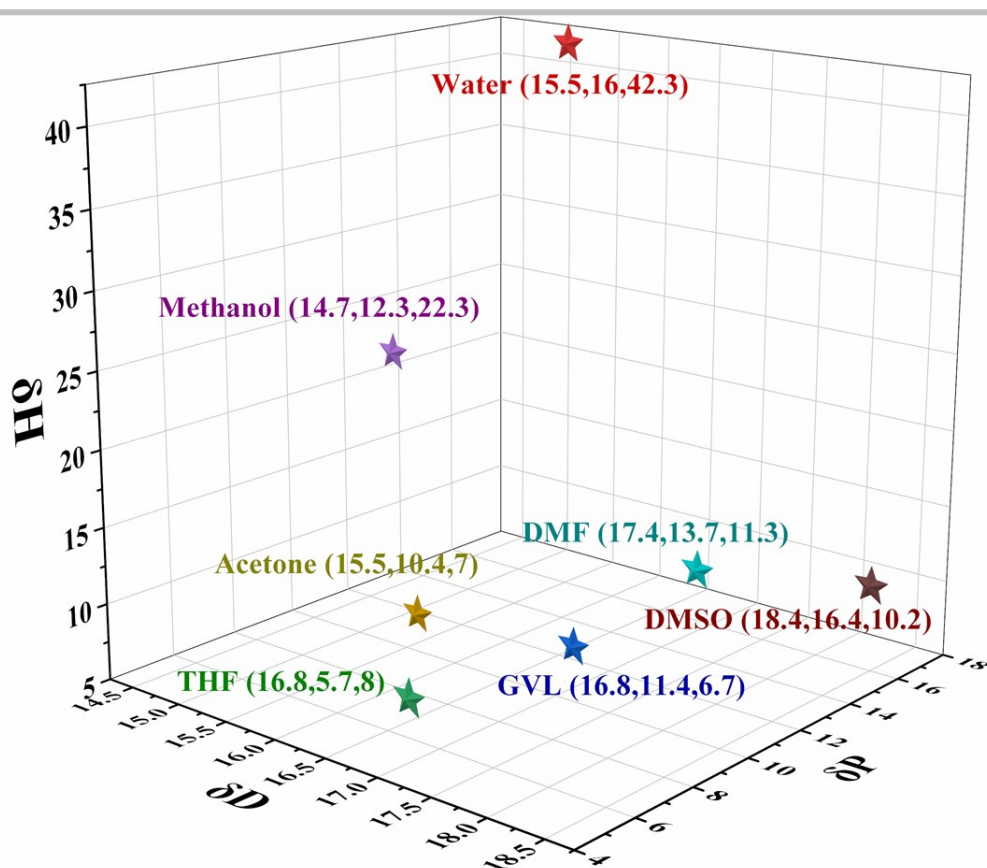

**Figure S1.** Hansen solubility parameters (HSP) of solvents obtained from HSPiP software.

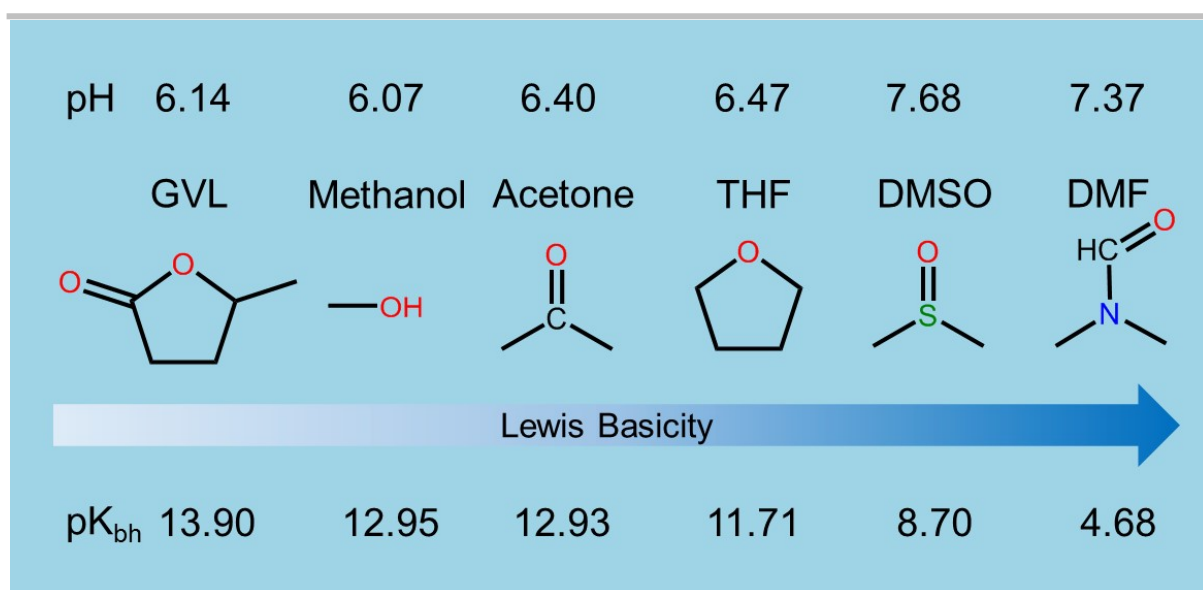

**Figure S2** pH value of lignin solution (40 mg/mL) in different solvents (organic solvent/water with the volume ratio of 4:1) determined by a pH meter (Starter 2100, OHAUS Instruments (Shanghai) Co.,Ltd. China) and the abilities ( $pK_{bh}$ ) of solvents binding hydrogen calculated by DFT.

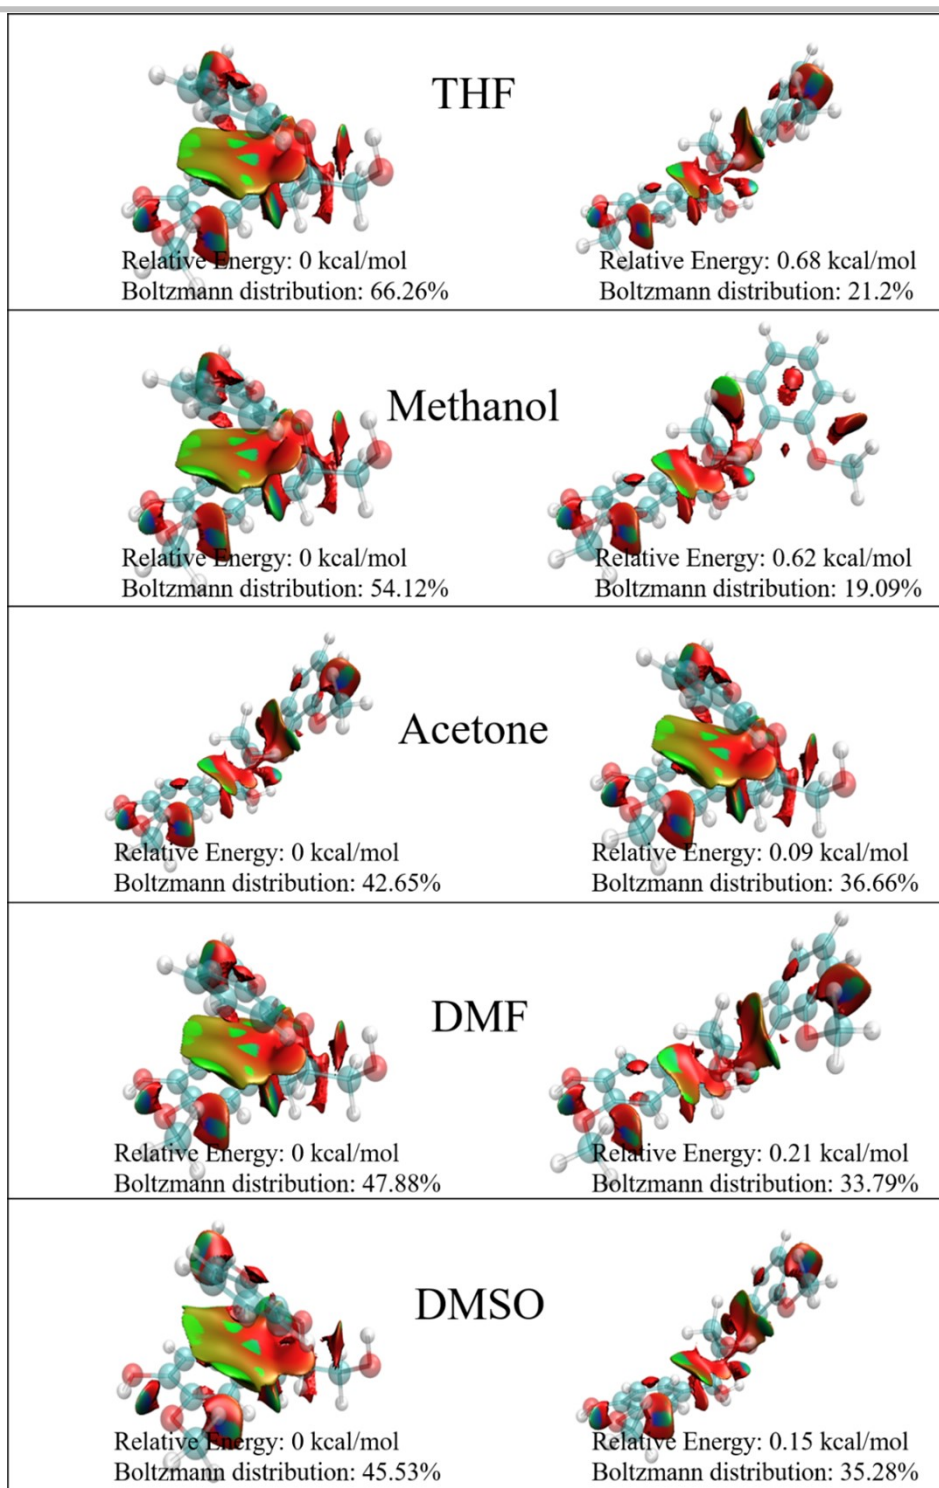

**Figure S3.** Isosurface (value=0.5) of reduced density gradient (RDG) of GGE configurations with the two lowest energies, respectively, in different implicit solvent models (GGE: CPK model, C-cyan, H-white, O-red).

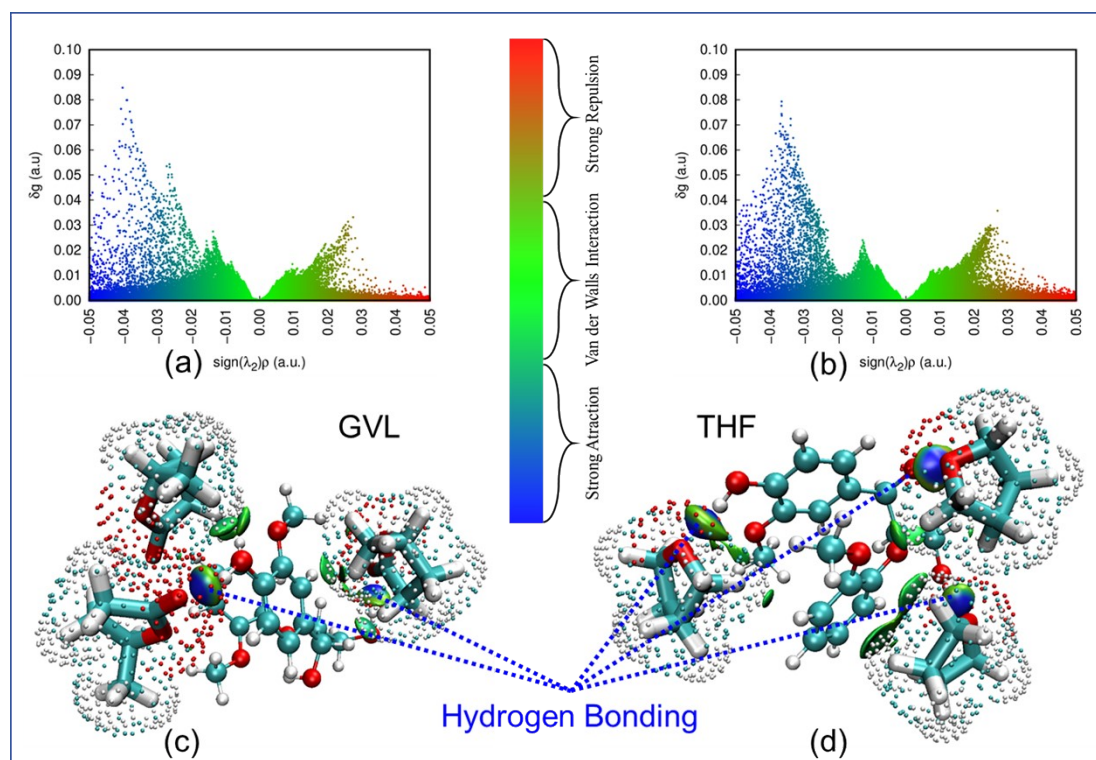

**Figure S4.** (a and b) Scatter graph and (c and d) isosurface (value=0.01 a.u.) of  $\delta g$  inter of GGE/solvent clusters based on independent gradient model (IGM) under implicit water model, respectively (GGE: CPK model; solvent molecules: solvent and licorice model, C-cyan, H-white, O-red).

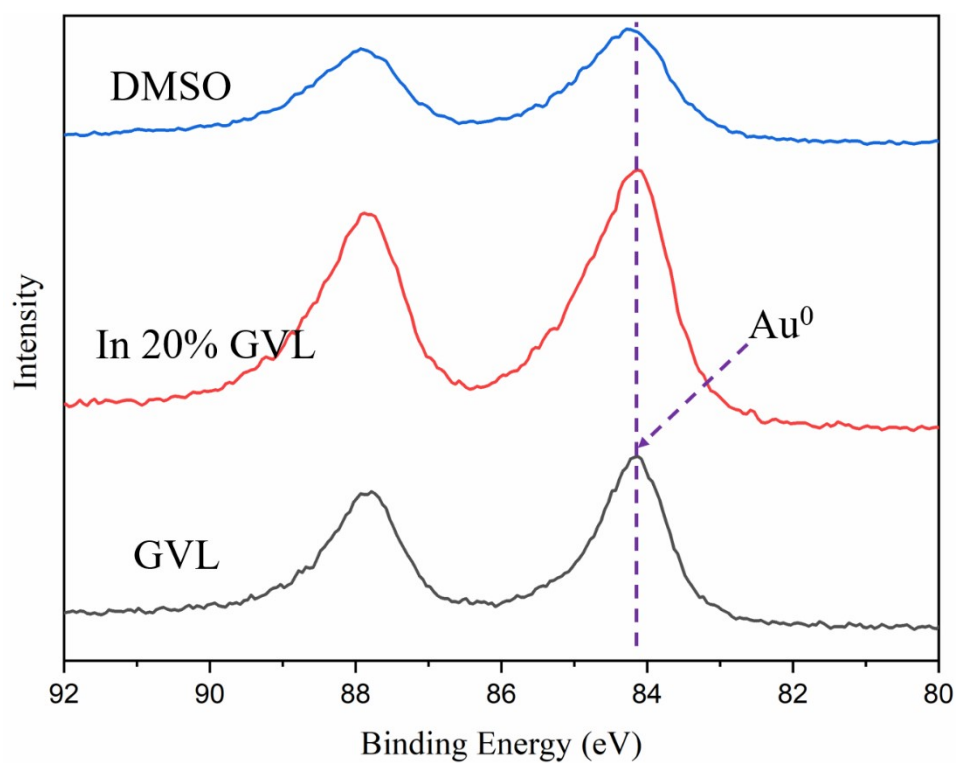

**Figure S5.** XPS spectra of Au-LNPs produced from GVL and DMSO, and the GVL-lignin solution dropped into 20% GVL solution.

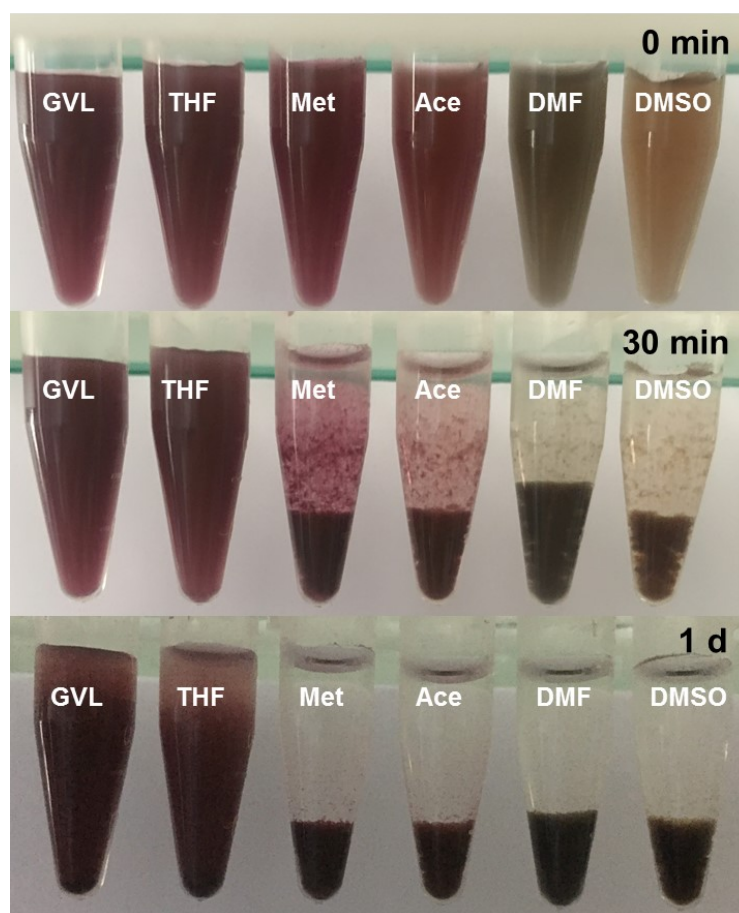

**Figure S6.** Images of obtained Au-LNPs from different solvents standing for different time.

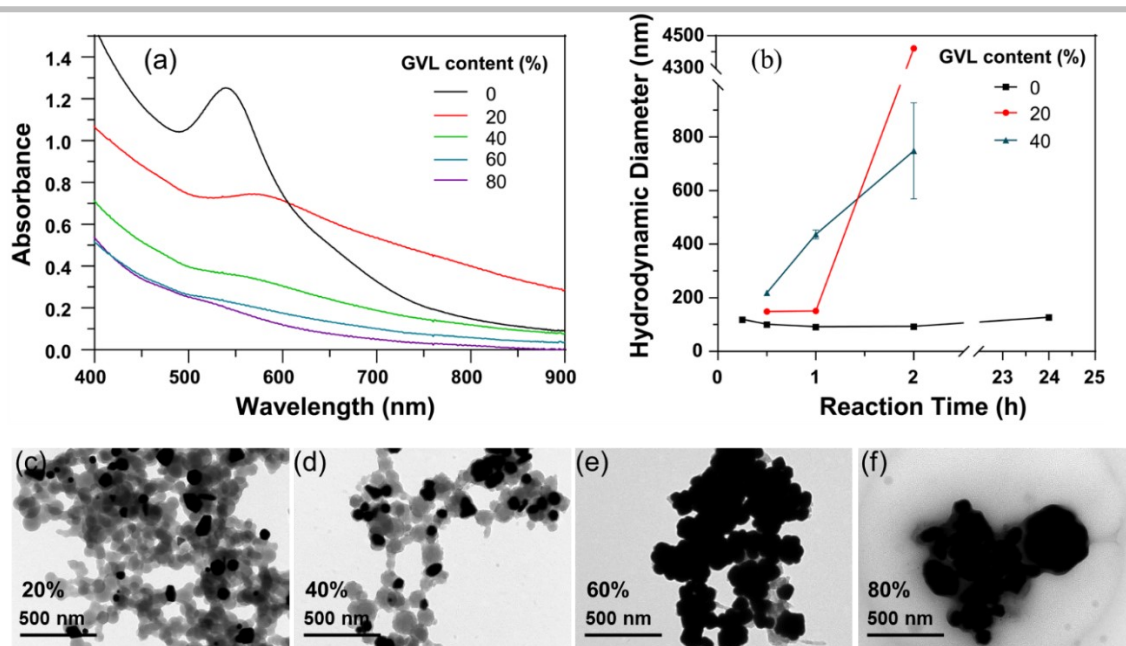

**Figure S7.** (a) UV-Visual spectra, (b) hydrodynamic diameters, and (c-f) TEM images of Au-LNPs from GVL-lignin solution dropped into GVL/water binary solvents with different GVL volume contents.

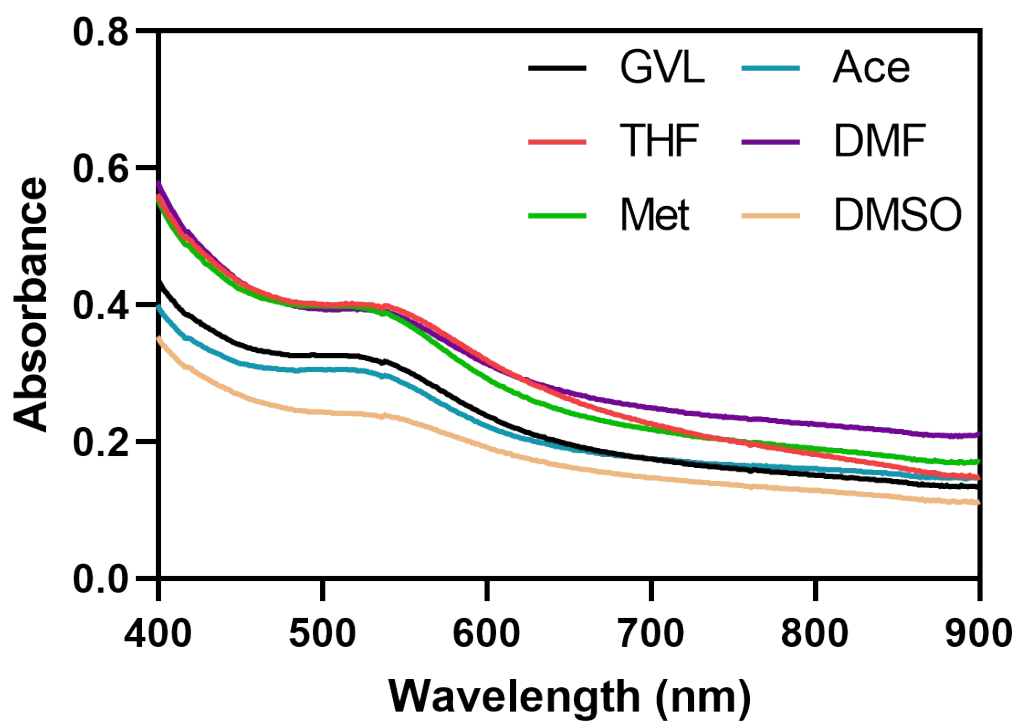

**Figure S8.** UV-Visual spectra of AuNPs produced from different solvents using ferulic acid as a reducing agent.

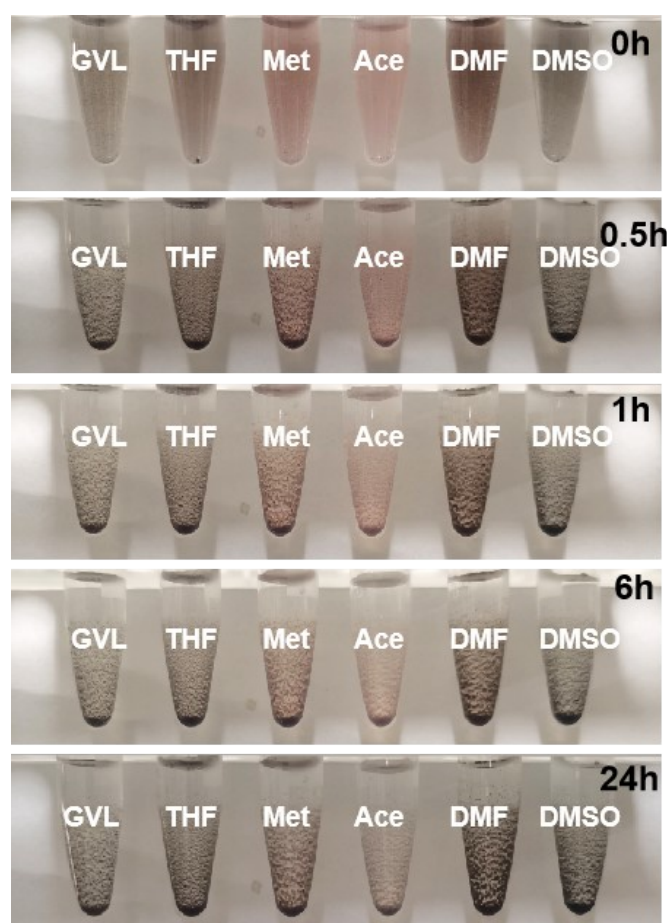

**Figure S9.** Images of AuNPs produced from different solvents using ferulic acid as a reducing agent standing for different time.

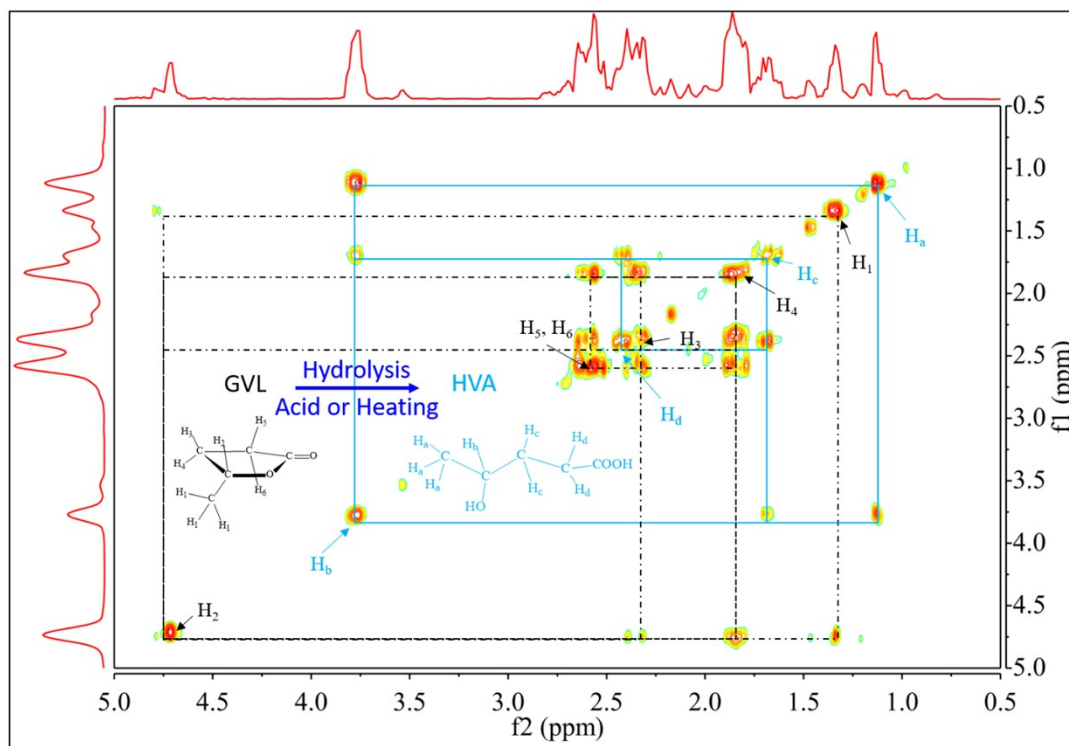

**Figure S10.** COSY-NMR of GVL and HVA detected by a Bruker AVANCEIII 500M NMR Spectrometer. NMR tube contained 1 mM chloroauric acid and 50  $\mu$ L GVL in 0.8 mL D<sub>2</sub>O was incubated at 30  $^{\circ}$ C for 2 h before the determination.

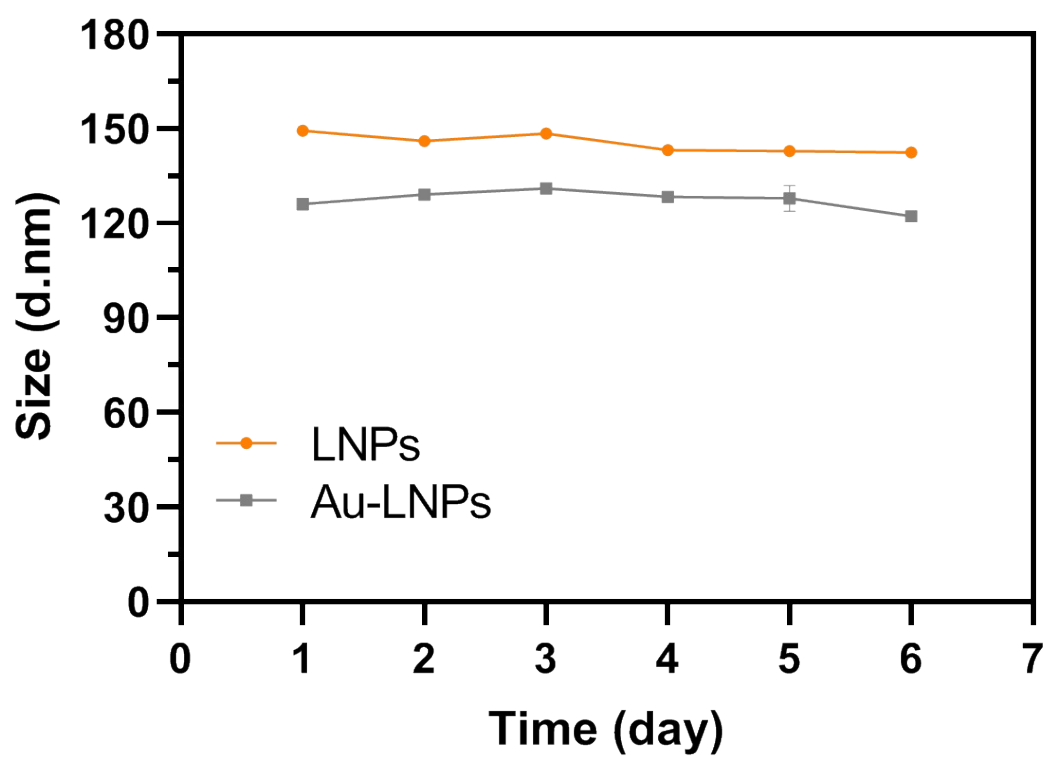

**Figure S11.** Time-dependent hydrodynamic diameters of different nanoparticles.

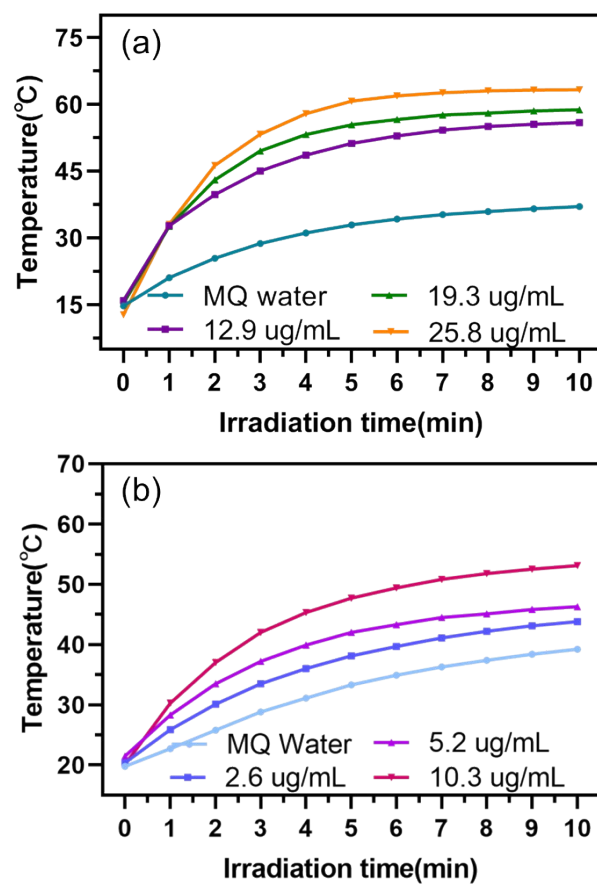

**Figure S12.** Heating profiles of Au-LNPs at different Au concentrations irradiated with an 808 nm laser power (2.5 W/cm<sup>2</sup>), and (b) a 660 nm laser power (1.2 W/cm<sup>2</sup>), respectively.
